# Supplementary material for: Phosphatidylserine transport by Ups2–Mdm35 in respiration-active mitochondria
Source: PubMed Central journal article supplement — J Cell Biol. 2016 Jul 4;214(1):77–88. doi: 10.1083/jcb.201601082 (PMC4932372; doi:10.1083/jcb.201601082), 2016-07-04
Supplement: JCB_201601082_sm.pdf [file JCB_201601082_sm.pdf]

Miyata et al., <http://www.jcb.org/cgi/content/full/jcb.201601082/DC1>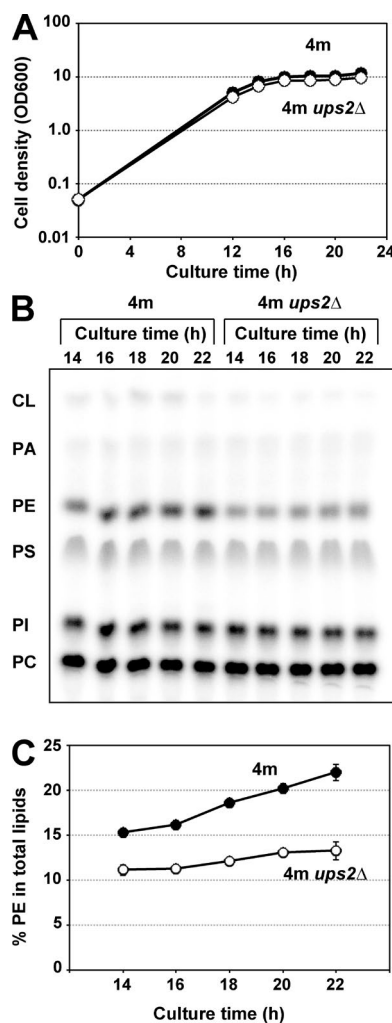

Figure S1. **Ups2 enhances PE accumulation in the post-log phase in a synthetic medium.** (A) 4m and 4m *ups2*Δ cells (OD<sub>600</sub>, 0.05) were cultured in SCD supplemented with 3 mM choline for the indicated periods. At each time point, the cell density was analyzed by measuring OD<sub>600</sub>. Closed circle, 4m cells; open circle, 4m *ups2*Δ cells. (B and C) 4m and 4m *ups2*Δ cells (OD<sub>600</sub>, 0.05) were cultured in SCD supplemented with 3 mM choline in the presence of [<sup>32</sup>P]Pi for the indicated periods. At each time point, total cellular phospholipids were extracted, separated by TLC, and then analyzed by an imaging analyzer. (C) The percentages of PE relative to total phospholipids. The mean values for two independent experiments and deviations are shown. Closed circle, 4m cells; open circle, 4m *ups2*Δ cells.

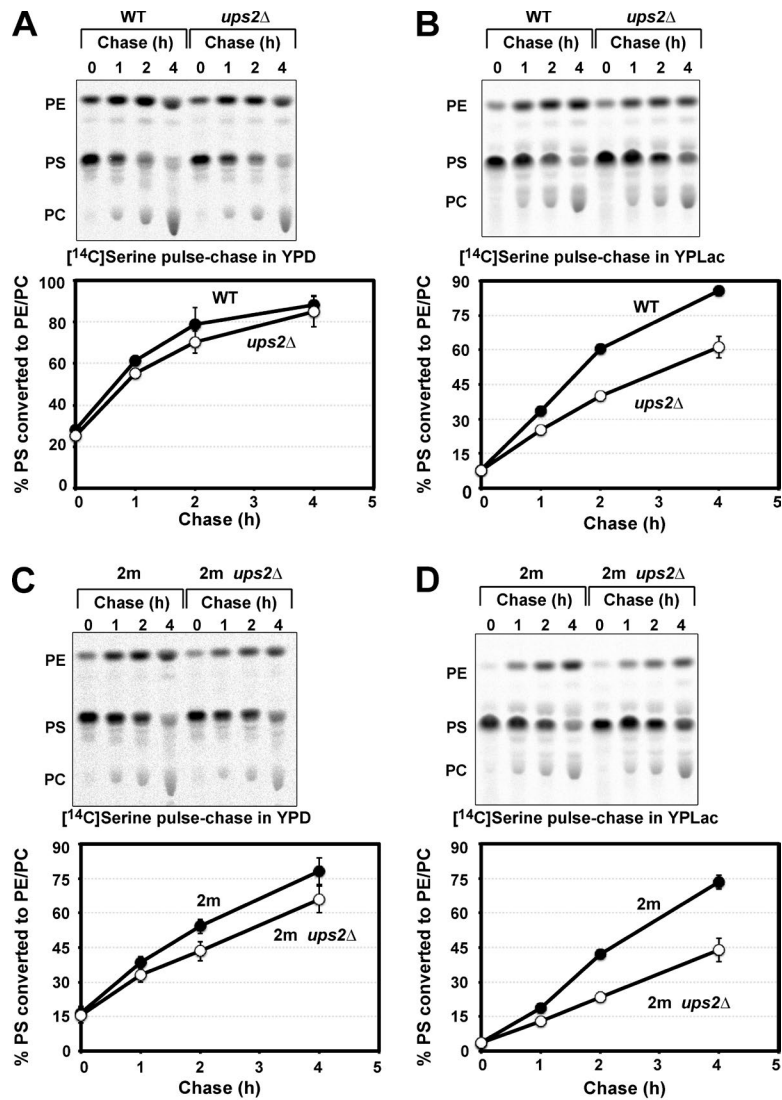

Figure S2. **Ups2 is involved in PS conversion to PE in wild-type and 2m cells under nonfermentable conditions.** (A) PS conversion to PE and PC in wild-type and *ups2* $\Delta$  cells growing in YPD was analyzed as in Fig. 5. The mean values for two independent experiments and deviations are shown. (B) PS conversion to PE and PC in wild-type and *ups2* $\Delta$  cells growing in YPLac was analyzed as in Fig. 5. The mean values for two independent experiments and deviations are shown. (C) PS conversion to PE and PC in 2m and 2m *ups2* $\Delta$  cells growing in YPD was analyzed as in Fig. 5. The mean values for two independent experiments and deviation are shown. (D) PS conversion to PE and PC in 2m and 2m *ups2* $\Delta$  cells growing in YPLac was analyzed as in Fig. 5. The mean values for two independent experiments and deviations are shown.

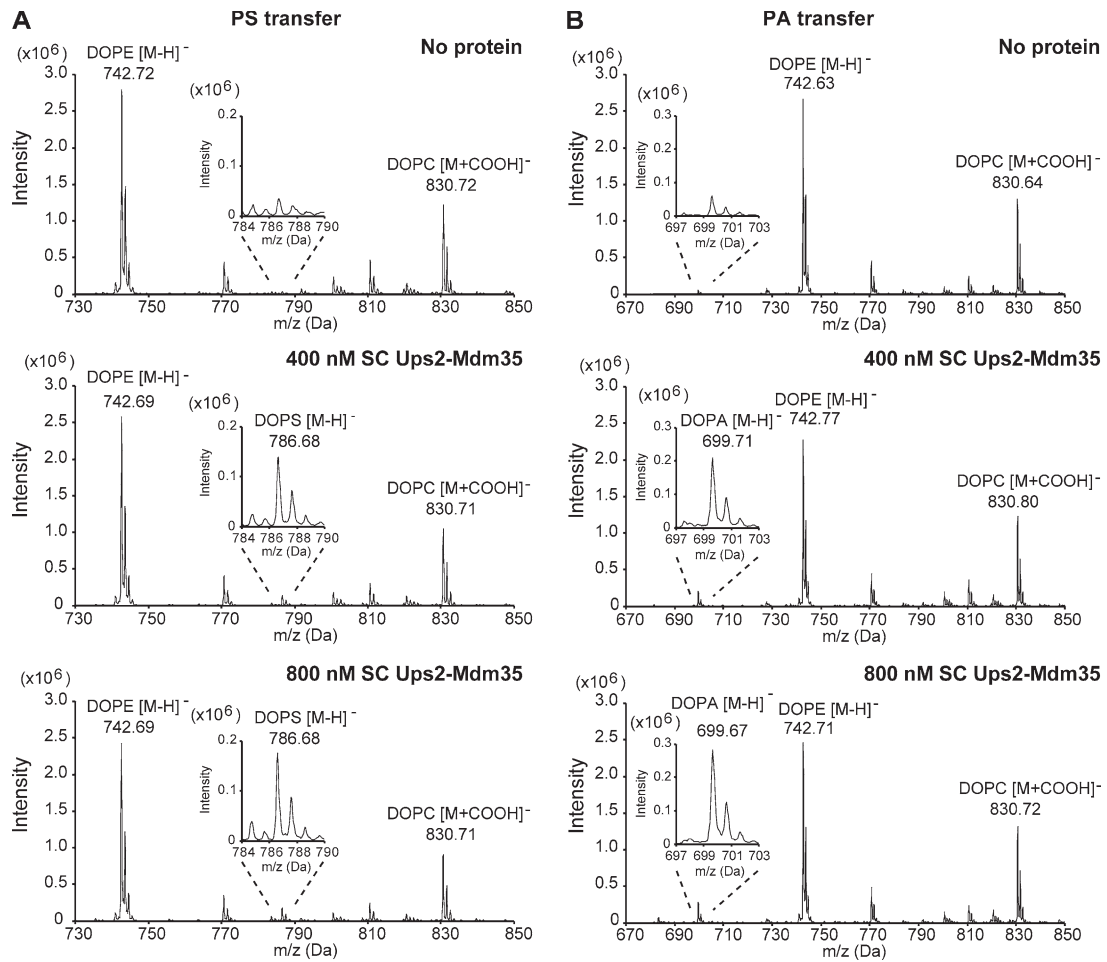

Figure S3. **Mass spectrometry-based phospholipid transfer assay.** (A and B) SC Ups2-Mdm35 was incubated with heavy donor liposomes (200  $\mu$ M; DOPC/DOPE/DOPS/18:1 Liss-Rhod-PE = 50/29.9/20/0.1) or (200  $\mu$ M; DOPC/DOPE/DOPA/18:1 Liss-Rhod-PE = 50/29.9/20/0.1) containing 10% sucrose and light acceptor liposomes (200  $\mu$ M; DOPC/DOPE/18:1 CL = 50/40/10) at 25°C for 10 min. Liposomes were separated by sucrose density-gradient ultracentrifugation. Phospholipids in the acceptor liposomes were analyzed by mass spectrometry. DOPE, DOPS, and DOPA in acceptor liposomes were detected as singly charged ions and indicated in the charts. DOPC in acceptor liposomes was detected as a formate adduct ion and indicated in the charts.

Table S1. Yeast strains used in this study

| Strain name                                     | Genetic background | Mating type | Genotype                                                                                                      | Source              |
|-------------------------------------------------|--------------------|-------------|---------------------------------------------------------------------------------------------------------------|---------------------|
| TKY705 (Wild Type)                              | W303               | a           | <i>ura3-52 trp1Δ leu2-3_112 his3-11 ade2-1 CAN1</i>                                                           | Kuroda et al., 2011 |
| OKY7063 ( <i>ups2Δ</i> )                        | W303               | a           | TKY705, <i>ups2Δ::CgLEU2</i>                                                                                  | This study          |
| OKY6003 ( <i>psd1Δ</i> )                        | W303               | a           | TKY705, <i>psd1Δ::natMX4 can1-100</i>                                                                         | This study          |
| OKY6030 ( <i>psd1Δ ups2Δ</i> )                  | W303               | a           | TKY705, <i>psd1Δ::natMX4 ups2Δ::hphNT1 can1-100</i>                                                           | This study          |
| OKY7049 (2m or <i>psd2Δ dpl1Δ</i> )             | W303               | a           | TKY705, <i>psd2Δ::CgURA3 dpl1Δ::CgTRP1</i>                                                                    | This study          |
| OKY7055 (2m <i>ups2Δ</i> )                      | W303               | a           | TKY705, <i>psd2Δ::CgURA3 dpl1Δ::CgTRP1 ups2Δ::CgLEU2</i>                                                      | This study          |
| OKY7081 (4m or <i>psd2Δ dpl1Δ cho2Δ opi3Δ</i> ) | W303               | a           | TKY705, <i>psd2Δ::CgURA3 dpl1Δ::CgTRP1 cho2Δ::hphNT1 opi3Δ::natNT2</i>                                        | This study          |
| OKY7084 (4m <i>ups2Δ</i> )                      | W303               | a           | TKY705, <i>psd2Δ::CgURA3 dpl1Δ::CgTRP1 cho2Δ::hphNT1 opi3Δ::natNT2 ups2Δ::CgLEU2</i>                          | This study          |
| OKY7112 (4m <i>mdm35Δ</i> )                     | W303               | a           | TKY705, <i>psd2Δ::CgURA3 dpl1Δ::CgTRP1 cho2Δ::hphNT1 opi3Δ::natNT2 mdm35Δ::CgLEU2</i>                         | This study          |
| OKY7111 (4m <i>UPS2† MDM35†</i> )               | W303               | a           | TKY705, <i>psd2Δ::CgURA3 dpl1Δ::CgTRP1 cho2Δ::hphNT1 opi3Δ::CgHIS3 GPDpr-UPS2::kanMX4 GPDpr-MDM35::natNT2</i> | This study          |
| OKY7103 (4m <i>ups1Δ</i> )                      | W303               | a           | TKY705, <i>psd2Δ::CgURA3 dpl1Δ::CgTRP1 cho2Δ::hphNT1 opi3Δ::natNT2 ups1Δ::CgHIS3</i>                          | This study          |
| OKY7104 (4m <i>ups1Δ ups2Δ</i> )                | W303               | a           | TKY705, <i>psd2Δ::CgURA3 dpl1Δ::CgTRP1 cho2Δ::hphNT1 opi3Δ::natNT2 ups1Δ::CgHIS3 ups2Δ::CgLEU2</i>            | This study          |
| OKY7068 ( <i>UPS1-HA</i> )                      | W303               | a           | TKY705, <i>UPS1-HA::kanMx4</i>                                                                                | This study          |
| OKY7069 ( <i>UPS2-HA</i> )                      | W303               | a           | TKY705, <i>UPS2-HA::kanMx4</i>                                                                                | This study          |

GPD, glyceraldehyde-3-phosphate dehydrogenase.

Table S2. PCR templates and primers used for gene manipulation

| Gene                       | Template plasmid          | Source                          | Primers (5' to 3')                                                                                                                              |
|----------------------------|---------------------------|---------------------------------|-------------------------------------------------------------------------------------------------------------------------------------------------|
| <i>ups2Δ::CgLEU2</i>       | pCgLEU2-NT1               | This study                      | 1: TCAGACTAAGATAAAAATAATCGAGAATAATTAAGACGATAATGCGTACGCTGCAGGTCGAC<br>2: AAGTAGTATGCAGTGCCATGCGGGATCAAGGAATTTGTATCTCTAATCGATGAATTCGAGCTCG        |
| <i>ups2Δ::hphNT1</i>       | pFA6a-hphNT1 <sup>a</sup> | EUROSCARF                       | 1: TCAGACTAAGATAAAAATAATCGAGAATAATTAAGACGATAATGCGTACGCTGCAGGTCGAC<br>2: AAGTAGTATGCAGTGCCATGCGGGATCAAGGAATTTGTATCTCTAATCGATGAATTCGAGCTCG        |
| <i>psd1Δ::natMX4</i>       | p4339 <sup>b</sup>        | Gift from C. Boone <sup>c</sup> | 1: TTGGTCGTTATTTTTGAAGAAGAAGGAAAAGCAAAGCCAGCATGACATGGAGGCCAGAATA<br>CCCT<br>2: TATATACAGCAAATAAATGCTAATTTACATATGATTGCTTTCACAGTATAGCGACCAGCATTAC |
| <i>psd2Δ::CgURA3</i>       | pCgURA3-NT2               | This study                      | 1: TGGTAAAGAATCCTCGATTTTCAGGAGCATCCAACGACGAAGATGCGTACGCTGCAGGTCGAC<br>2: TTTTCCATTTTGGTAAACCCTAAGTACAGCCAATTTTCGCGCGCTTCAATCGATGAATTCGAGCTCG    |
| <i>dpl1Δ::CgTRP1</i>       | pCgTRP1-TB                | This study                      | 1: AAGTAGGCTAGCTTCTGTAAAGGGATTTTCCATCTAATACAATGCGTACGCTGCAGGTCGAC<br>2: CTCTCGTCTTTAAATATGATGAGATTTGATTCTATATAGCTAATCGATGAATTCGAGCTCG           |
| <i>cho2Δ::hphNT1</i>       | pFA6a-hphNT1 <sup>a</sup> | EUROSCARF                       | 1: CGAGTGATTTCTTAGTGACAAAGCTTTTCTCATCTGTAGATGCGTACGCTGCAGGTCGAC<br>2: ATCCAGTACTTTTTAAATATATATACTCAAAAAAAAAAACTCAATCGATGAATTCGAGCTCG            |
| <i>opi3Δ::natNT2</i>       | pFA6a-natNT2 <sup>a</sup> | EUROSCARF                       | 1: TAAACAGCAATTGAAGACAACAAGAATAGCGCAAGTCAAGCGATGCGTACGCTGCAGGTCGAC<br>2: GCATAGGCTCTAACATTATAGAATATATAGAAATAGAGCATTAAATCGATGAATTCGAGCTCG        |
| <i>opi3Δ::CgHIS3</i>       | pCgHIS3-TB                | This study                      | 1: TAAACAGCAATTGAAGACAACAAGAATAGCGCAAGTCAAGCGATGCGTACGCTGCAGGTCGAC<br>2: GCATAGGCTCTAACATTATAGAATATATAGAAATAGAGCATTAAATCGATGAATTCGAGCTCG        |
| <i>mdm35Δ::CgLEU2</i>      | pCgLEU2-NT1               | This study                      | 1: GTGTTTTAACTTGAATTAACAATAAATACCAGTTTTATGCGTACGCTGCAGGTCGAC<br>2: TTACATGTTGAATAATGCACATTCTGTGCTAAAATATATACTTCAATCGATGAATTCGAGCTCG             |
| <i>UPS1Δ::CgHIS3</i>       | pCgHIS3-TB                | This study                      | 1: TCTGGCTTCTGAGACGGCGGTAAGATATCCTTAAGAGTTGCAATGCGTACGCTGCAGGTCGAC<br>2: CTCGCCATGGTGATCTTTAAAGATCTTTAAATGGGAACATCAATCGATGAATTCGAGCTCG          |
| <i>GPDpr-UPS2::kanMX4</i>  | pYM-N14 <sup>a</sup>      | EUROSCARF                       | 1: TCAGACTAAGATAAAAATAATCGAGAATAATTAAGACGATAATGCGTACGCTGCAGGTCGAC<br>2: CTGGTCCCATGATAGTTGAAATCGTAACTGTTTTGAAACAATTCATCGATGAATTCGAGCTCG         |
| <i>GPDpr-MDM35::natNT2</i> | pYM-N15 <sup>a</sup>      | EUROSCARF                       | 1: GTGTTTTAACTTGAATTAACAATAAATACCAGTTTTATGCGTACGCTGCAGGTCGAC<br>2: CAGGTCAGTGCATTAGGCGCAAACTAGCTGACATTATATCCCATCGATGAATTCGAGCTCG                |
| <i>UPS1-HA::kanMX4</i>     | pYM45 <sup>a</sup>        | EUROSCARF                       | 1: TCTGGCTTCTGAGACGGCGGTAAGATATCCTTAAGAGTTGCAATGCGTACGCTGCAGGTCGAC<br>2: GCATTTGTTATCAAAAACCTGAAGAGGCGGAGAAATCCTCAGTTTCGATGCGTGCAGGTCGAC        |
| <i>UPS2-HA::kanMX4</i>     | pYM45 <sup>a</sup>        | EUROSCARF                       | 1: AAGTAGTATGCAGTGCCATGCGGGATCAAGGAATTTGTATCTCTAATCGATGAATTCGAGCTCG<br>2: CAGCAAAATATTGACTTGTAGAGAGCGCATACAACCACGAAAATCGTACGCTGCAGGTCGAC        |

<sup>a</sup>Janke et al., 2004.

<sup>b</sup>Tong and Boone, 2006.

<sup>c</sup>University of Toronto, Toronto, Ontario, Canada.

## References

- Janke, C., M.M. Magiera, N. Rathfelder, C. Taxis, S. Reber, H. Maekawa, A. Moreno-Borchart, G. Doenges, E. Schwob, E. Schiebel, and M. Knop. 2004. A versatile toolbox for PCR-based tagging of yeast genes: new fluorescent proteins, more markers and promoter substitution cassettes. *Yeast*. 21:947–962. <http://dx.doi.org/10.1002/yea.1142>
- Kuroda, T., M. Tani, A. Moriguchi, S. Tokunaga, T. Higuchi, S. Kitada, and O. Kuge. 2011. FMP30 is required for the maintenance of a normal cardiolipin level and mitochondrial morphology in the absence of mitochondrial phosphatidylethanolamine synthesis. *Mol. Microbiol.* 80:248–265. <http://dx.doi.org/10.1111/j.1365-2958.2011.07569.x>
- Tong, A.H., and C. Boone. 2006. Synthetic genetic array analysis in *Saccharomyces cerevisiae*. *Methods Mol. Biol.* 313:171–192. <http://dx.doi.org/10.1385/1-59259-958-3:171>
